1 **Title:** Quantifying geographic accessibility to improve cost-effectiveness of entomological monitoring.

2 **Short title:** Entomological monitoring using GIS.

3 **Authors:** Joshua Longbottom<sup>1, 2</sup>, Ana Krause<sup>1</sup>, Stephen J. Torr<sup>1</sup>, Michelle C. Stanton<sup>1, 2</sup>

4

5 **Author Affiliation:**

6 <sup>1</sup>Department of Vector Biology, Liverpool School of Tropical Medicine, Liverpool, L3 5QA

7 <sup>2</sup>Centre for Health Informatics, Computing and Statistics, Lancaster Medical School, Lancaster University,

8 Lancaster, LA1 4YW

9

10 **Corresponding author:**

11 Mr Joshua Longbottom

12 Department of Vector Biology,

13 Liverpool School of Tropical Medicine,

14 Liverpool, L3 5QAUK

15 Email: [joshua.longbottom@lstmed.ac.uk](mailto:joshua.longbottom@lstmed.ac.uk)

16

17 **ORCIDs:**

18 Joshua Longbottom: <https://orcid.org/0000-0002-4151-9031>

19 Ana Krause: <https://orcid.org/0000-0002-9665-5102>

20 Stephen J. Torr: <https://orcid.org/0000-0001-9550-4030>

21 Michelle C. Stanton: <https://orcid.org/0000-0002-1754-4894>

22

23

24 **Abstract:**

25 **Background**

26 Vector-borne diseases are important causes of mortality and morbidity in humans and livestock,  
27 particularly for poorer communities and countries in the tropics. Large-scale programs against these  
28 diseases, for example malaria, dengue and African trypanosomiasis, include vector control, and  
29 assessing the impact of this intervention requires frequent and extensive monitoring of disease vector  
30 abundance. Such monitoring can be expensive, especially in the later stages of a successful program  
31 where numbers of vectors and cases are low.

32 **Methodology/Principal Findings**

33 We developed a system that allows the identification of monitoring sites where pre-intervention  
34 densities of vectors are predicted to be high, and travel cost to sites is low, highlighting the most cost-  
35 effective locations for longitudinal monitoring. Using remotely sensed imagery and an image  
36 classification algorithm, we mapped landscape resistance associated with on- and off-road travel for  
37 every gridded location (3m and 0.5m grid cells) within Koboko district, Uganda. We combine the  
38 accessibility surface with pre-existing estimates of tsetse abundance and propose a stratified sampling  
39 approach to determine cost-effective locations for longitudinal data collection. Our modelled  
40 predictions were validated against empirical measurements of travel-time and existing maps of road  
41 networks.

42 We applied this approach in northern Uganda where a large-scale vector control program is being  
43 implemented to control human African trypanosomiasis, a neglected tropical disease (NTD) caused by  
44 trypanosomes transmitted by tsetse flies. Our accessibility surfaces indicate a high performance when  
45 compared to empirical data, with remote sensing identifying a further ~70% of roads than existing  
46 networks.

47 **Conclusions/Significance**

48 By integrating such estimates with predictions of tsetse abundance, we propose a methodology to  
49 determine the optimal placement of sentinel monitoring sites for evaluating control programme  
50 efficacy, moving from a nuanced, ad-hoc approach incorporating intuition, knowledge of vector ecology  
51 and local knowledge of geographic accessibility, to a reproducible, quantifiable one.

52

### 53 **Author Summary**

54 Assessing the impact of vector control programmes requires longitudinal measurements of the  
55 abundance of insect vectors within intervention areas. Such monitoring can be expensive, especially in  
56 the later stages of a successful program where numbers of vectors and cases of disease are low. Cost-  
57 effective monitoring involves a prior selection of monitoring sites that are easy to reach and produce  
58 rich information on vector abundance. Here, we used image classification and cost-distance algorithms  
59 to produce estimates of accessibility within Koboko district, Uganda, where vector control is  
60 contributing to the elimination of sleeping sickness, a neglected tropical disease (NTD). We combine an  
61 accessibility surface with pre-existing estimates of tsetse abundance and propose a stratified sampling  
62 approach to determine locations which are associated with low cost (lowest travel time) and potential  
63 for longitudinal data collection (high pre-intervention abundance). Our method could be adapted for use  
64 in the planning and monitoring of tsetse- and other vector-control programmes. By providing methods  
65 to ensure that vector control programmes operate at maximum cost-effectiveness, we can ensure that  
66 the limited funding associated with some of these NTDs has the largest impact.

67

68 **Keywords:** Accessibility, Entomology, Remote sensing, Resistance, Vector control

69

70

71

## 72 **1. Introduction**

73 Vector-borne diseases (VBDs) are important causes of mortality and morbidity in humans and livestock,  
74 particularly for poorer communities and countries in the tropics, accounting for an estimated 17% of the  
75 global burden of all infectious diseases (1). The control of VBDs, or their elimination as a public health  
76 problem, is dependent upon effective vector management, which includes pre-intervention surveys and  
77 subsequent longitudinal monitoring of vector abundance to assess the effectiveness of an intervention.  
78 Such monitoring is an important component of the overall costs of control.

79  
80 To improve the cost-effectiveness of vector control programs, there is a requirement to identify optimal  
81 locations for longitudinal monitoring site placement. Ideally, these sites should be in locations that  
82 maximise information on the distribution and density of vectors while minimising costs of obtaining  
83 these data. In practice, most vector surveillance is opportunistic and lacks a rigorous framework (2). A  
84 more rational method would involve combining information on vector abundance with estimates of  
85 geographical accessibility, to identify sites across operational areas where pre-intervention catches are  
86 high and sampling costs are low. Towards this goal, we examined the utility of remotely sensed (RS) data  
87 to produce contemporary estimates of geographic accessibility to entomological sampling sites, using  
88 sleeping sickness control as an example application.

89

### 90 **1.1 Sleeping sickness control as an example application**

91 Human African trypanosomiasis (HAT) is a neglected tropical disease (NTD) affecting remote areas of  
92 sub-Saharan Africa. The disease, also termed 'sleeping sickness', is caused by the protozoan parasite  
93 *Trypanosoma brucei* with two sub-species, *T.b.gambiense* and *T.b.rhodesiense*, causing Gambian (gHAT)  
94 and Rhodesian (rHAT) human African trypanosomiasis respectively. The burden of the Gambian form of  
95 the disease, for which humans are the main hosts, is >10 times that of the Rhodesian form, with annual

96 reported cases being in the region of 2-3,000 (3). The World Health Organization (WHO) has targeted  
97 the elimination of gHAT as a “public health problem” by 2020, which is defined as a 90% reduction in  
98 areas reporting >1 case in 10 000 compared to 2000–2004, and <2000 annually reported cases globally  
99 (4). Several countries appear to be on track to achieve this target (5). Uganda is unique in that it is the  
100 only country where both gHAT and rHAT occur, albeit within different local level zones (6, 7). Vector  
101 control forms an important part of Uganda’s efforts against both forms of HAT (8, 9).

102  
103 The important vectors of gHAT are Palpalis-group species of tsetse, which concentrate in riverine  
104 vegetation where, consequently, interventions are focused. In Uganda, tsetse control is being achieved  
105 through the deployment of Tiny Targets, small (20 x 50 cm) panels of insecticide-treated material which  
106 are deployed at 50-100m intervals along rivers (9, 10). Prior work produced estimates of tsetse  
107 abundance across Northern Uganda, identifying locations of high pre-intervention abundance (11),  
108 which has informed the identification of operational control areas.

109  
110 Methods to quantify accessibility largely involve cost-distance analyses, which have been widely used  
111 within the field of public health in analyses mapping accessibility to healthcare (12-15). Such analyses  
112 require an input surface of landscape friction (‘resistance’) – estimates of associated travel cost for  
113 gridded cells within a Cartesian plane. The cost-distance analysis identifies the cumulative cost of  
114 traversing each cell based on the given resistance surface and an origin location – opting to traverse  
115 through cells associated with the lowest resistance values. The use of accessibility mapping in the  
116 planning and implementation of control programmes for vector-borne disease is novel and has the  
117 potential to improve the cost-effectiveness of monitoring VBD interventions.

118

119 In this paper, we use RS satellite data to derive a contemporary road network within Koboko district,  
120 Northern Uganda, where an existing tsetse control programme is in operation. To obtain a road network  
121 within this district, we compare the utility of RS data at two differing spatial resolutions (one source  
122 characterising locations within the district as  $3 \times 3\text{m}$  grid cells on a Cartesian plane, and another as  $0.5 \times$   
123  $0.5\text{m}$  grid cells) (16, 17), and an existing open source dataset detailing road locations (18). Image  
124 classification algorithms, specifically maximum likelihood estimators were used to detect dirt and  
125 tarmac roads within the RS imagery (19). Ground truth tracking (GPS) data detailing motorbike speeds  
126 along roads within the district were used to assign on-road travel costs to each grid cell. We used  
127 published estimates of time taken to traverse through different densities of vegetation to assign  
128 resistance values to off-road grid cells (20, 21). Resistance surfaces were validated using withheld  
129 ground-truth tracking data, comparing observed and predicted travel times within a linear regression.  
130 The resulting resistance surfaces were used within a least-cost path algorithm to identify cumulative  
131 costs to locations of high tsetse abundance (11). We apply a stratified sampling approach to determine  
132 locations which are associated with low cost (lowest travel time) and potential for rich longitudinal data  
133 collection (high pre-intervention abundance).

134  
135 Here, by combining field data on travel time along varying road types and remotely sensed imagery, we  
136 describe the process of producing a high-resolution accessibility surface. By integrating such estimates  
137 with predictions of tsetse abundance, we propose a methodology to determine the optimal placement  
138 of sentinel monitoring sites for evaluating the efficacy of a tsetse control programme, moving from a  
139 nuanced, ad-hoc approach incorporating intuition, knowledge of vector ecology and local knowledge of  
140 geographic accessibility to a reproducible, quantifiable one. The work described here is presented in the  
141 context of tsetse control, but the methods used are applicable to a wide range of vector-borne diseases.

142

143 **2. Materials and Methods**

144 **2.1 Study area:** The focal area of this study was Koboko District, located within the West Nile Region of  
145 Uganda. The West Nile region consists of eight districts, with current and planned intervention initiatives  
146 (i.e. the Tiny Target programme), operating in seven. Koboko district covers roughly 860km<sup>2</sup> and has a  
147 population of 229,200 people (22). Between 2000 and 2018, 14.6% (620/4235) of gHAT cases reported  
148 from Uganda occurred in Koboko, but the incidence of gHAT is in decline as a consequence of an  
149 integrated programme of screening and treatment of the human population and, more recently, vector  
150 control (23). A map showing the location of existing, and planned intervention areas within West Nile  
151 Region is provided as Fig. S1, highlighting the position of Koboko within these intervention districts.

152

153 **2.2 Field methodology and data collection:** To obtain data informing variation in speeds along road  
154 class, technicians making routine visits to traps within Koboko were provided with GPS devices. The  
155 recording of GPS tracks was performed during three time periods in the dry season: May-June 2017,  
156 February-April 2018, and December 2018-January 2019. Trap attendants within Koboko operate using  
157 motorbikes; therefore, observed speeds were representative of motorbike-based travel. Devices were  
158 configured to record track points at ~15-second intervals.

159

160 **2.3 Obtaining remotely sensed satellite data:** To compare the effect of different spatial resolutions of  
161 satellite data on the ability to identify roads, we used two differing sources of RS imagery. Imagery  
162 obtained from PlanetScope™ satellites, captured on February 12<sup>th</sup>, 2018 were utilised. PlanetScope™  
163 imagery is provided at a 3m × 3m resolution, and includes the following four spectral bands: blue (455 –  
164 515 nm), green (500 – 590 nm), red (455 – 515 nm), and near infrared (780 – 860 nm) (16, 24).  
165 PlanetScope™ data are freely accessible through an education and research program account.

166 Data captured through the Pléiades-1A satellite, available at a 0.5m × 0.5m resolution and captured on  
167 27<sup>th</sup> December 2016 were used to represent high-spatial resolution imagery (25). Imagery captured on  
168 this date was the most contemporary data available. The Pléiades-1A imagery similarly consists of the  
169 same four spectral bands as PlanetScope™. Data obtained by Pléiades-1A is available by request through  
170 Airbus (previously known as the European Aeronautic Defence and Space Company) (17).

171

172 **2.4 GPS data review and cleaning:** To calculate travel speeds, the time-difference between subsequent  
173 points within a track and the Euclidean distance between these points were used within the following  
174 formula (Equation 1):

175

176 Where  $x_i$  represents the GPS coordinate of point  $i$ ,  $t_i$  represents the time recorded for point  $i$  and  $|| \cdot ||$   
177 represents the Euclidean distance:

$$speed = \frac{||x_i - x_j||}{|t_i - t_j|}$$

178

(Eq. 1)

179 Recorded points with a speed <1km/hr were assumed to be stationary points (based on average walking  
180 speeds (26)), and were removed from the track dataset. Similarly, we removed data points for which the  
181 speed exceeded 150 km/hr (93.2 mph) as these were likely to be artefacts created due to errors with  
182 location positioning and are not representative of true travel speed.

183

184 **2.5 Open street map validation:** To determine the accuracy of currently available open source data,  
185 OpenStreetMap (OSM) geolocated roads, and roads visible within 0.5m and 3m satellite data were  
186 compared. Shapefiles detailing mapped roads hosted by OSM were retrieved from Geofabrik OSM Data  
187 Extracts on March 3<sup>rd</sup>, 2018, to align with the dates during which field-obtained tracking data were  
188 collected (18). A 1 km × 1km fishnet constructed for Koboko district was used to produce a random



189 sample of 25 grid squares for manual digitisation. The digitisation process consisted of tracing over  
190 visible roads and tracks, as seen in the 0.5m resolution imagery (metric one), or as seen in the 3m  
191 resolution imagery (metric two). The length of digitized road obtained from each of the three sources  
192 was calculated in metres.

193  
194 **2.6 Remote sensing image preparation:** In total, 14 scenes covering an area of 745.8 km<sup>2</sup> were  
195 downloaded from Planet.com. To produce one complete surface, overlapping scenes were merged using  
196 ArcGIS (version 10.4), and the composite image was cropped to district boundaries. Imagery obtained  
197 from Pléiades-1A (0.5m) were provided as a pre-prepared mosaic.

198  
199 **2.7 Image classification:** To aid image classification, image segmentation utilising a mean-shift approach  
200 was first performed within ArcGIS. We applied a maximum likelihood classification algorithm using an *a*  
201 *priori* probability weighting to identify the class in which each cell had the highest probability of being a  
202 member (19). We opted to use the following classes within this analysis: dirt road and/or track, tarmac  
203 road, dense vegetation (for example: woodlands, forest, bushwood and shrubwood), grassland (for  
204 example: grassland, meadow, steppe and savannah) and barren land. To account for “salt and pepper”  
205 speckling effects representative of potentially misclassified and/or isolated cells, we performed post-  
206 classification processing. This processing stage included filtering to remove isolated cells, smoothing to  
207 smooth rugged class boundaries and generalizing to reclassify small regions of isolated cells. Post-  
208 classification cleaning was performed in ArcGIS.

209  
210 **2.8 Classification validation:** A total of 500 accuracy assessment points were randomly generated for  
211 each classified surface (i.e. 3m × 3m and 0.5m × 0.5m imagery). A step-by-step comparison was then  
212 made for each randomly selected point, noting the algorithm-derived class and the manually assigned

213 (ground-truth) class. Utilising this information, a confusion matrix was constructed for each image  
214 source. Accuracy was calculated with respect to both omission and commission rates, where omission  
215 refers to instances where a feature (point) is omitted from the evaluated category, and commission  
216 refers to instances where a feature is incorrectly assigned to the category being evaluated.

217

218 **2.9 Road network update:** Using the outputs from the image classification process, the GPS tracking  
219 data, and available OSM data, two contemporary road networks (one per remotely sensed data source)  
220 were produced. Cleaned, field-obtained tracking points were used to inform estimates of average travel  
221 speeds along selected roads as follows. Tracking points were converted to polylines, consisting of line  
222 segments constructed from five trailing points. These segments were assigned a mean observed speed  
223 by calculating the Euclidean distance of each segment and incorporating start and end times. These  
224 segments were then rasterised, resulting cells were stacked, and overlapping cells resulting from  
225 replicate trips across all tracking days were averaged. This produced a surface indicating the average  
226 observed speed for each cell. Tracks obtained during December 2018 were withheld from this network  
227 and were used for validation (see below). A surface detailing urban and rural locations (27) was used to  
228 categorise roads as being within urban or rural areas. This classification was paired with the Ugandan  
229 Traffic and Road Safety Act detailing maximum speed limits based on roads within urban/built-up areas  
230 and rural areas. Characterising roads by these features imply a legal maximum speed for each road  
231 representative of true travel speeds. Classified urban and classified rural cells were assigned the speeds  
232 given in Table 1, as informed by the official Traffic and Road Safety Act 2004 (28) and the Highway code  
233 (29).

234

235 **Table 1.** Assigned travel speeds to roads lacking ground-obtained tracking data.

| Road type | Speed (km/h) |
|-----------|--------------|
|-----------|--------------|

|             | Built-up area | Rural area |
|-------------|---------------|------------|
| Paved       | 50            | 100        |
| Gravel/dirt | 50            | 80         |

236

237 **2.10 Normalized Difference Vegetation Index analysis:** As the majority of mapped roads do not lead  
238 directly to a river or tributary, trap attendants are required to traverse off-road in order to reach  
239 suitable habitats for trap placement. We therefore aimed to characterise the cost associated with off-  
240 road travel within our analysis. Utilising the two differing imagery sources, two separate NDVI surfaces  
241 were generated (Equation 2). During the calculation, output values were normalised to range between -  
242 1.0 and 1.0, representing greenness. Generally, output NDVI values  $\leq 0$  represent waterbodies including  
243 lakes and major rivers; values between 0.1 and 0.2 represent barren land, including areas of rock, sand,  
244 or snow; values between 0.2 and 0.3 represent shrub and grassland (areas of moderate vegetation), and  
245 values between 0.3 and 0.8 represent areas of dense vegetation (for example temperate and tropical  
246 rainforest) (30, 31).

247

248 Where *NIR* represents the near infrared band, and *R* represents the red band within the RS imagery:

249

$$NDVI = \frac{(NIR - R)}{(NIR + R)}$$

250

(Eq. 2)

251 **2.11 Assigning off-road resistance values:** Resistance values are values associated with a specific cost to  
252 traverse through a cell (time, in seconds). For this study, off-road resistance values were assigned  
253 utilising the NDVI outputs, with cost values ranging based on indicative terrain. Locations which contain  
254 dense vegetation are generally slower to navigate and therefore cells representative of these areas were  
255 associated with a higher resistance value; conversely, cells which represent areas with little to no

256 vegetation were presumed to be easier to traverse and were assigned a lower resistance value. Average  
257 off-road walking speeds for differing terrains were obtained from published literature (20, 21) (Table 2).

258

259 **Table 2.** Resistance values (cell crossing time) associated with off-road travel.

| NDVI<br>value | Off road walking speed<br>(km/h) | Off road walking speed<br>(m/s) | Cell crossing time ( $t_i$ ) |         |
|---------------|----------------------------------|---------------------------------|------------------------------|---------|
|               |                                  |                                 | 0.5 × 0.5m                   | 3m × 3m |
| ≤0            | Essentially impassable           | Essentially impassable          | 200                          | 200     |
| 0.1-0.2       | 3.5                              | 0.97                            | 0.73                         | 4.37    |
| 0.2-0.3       | 2.48                             | 0.69                            | 1.03                         | 6.14    |
| 0.3-0.8       | 1.49                             | 0.41                            | 1.73                         | 10.34   |

260

261 **2.12 Resistance surface and cost-distance analysis:** The updated road networks, featuring a cell crossing  
262 time based on assigned speeds (representative of on-road resistance), were combined with their  
263 respective NDVI resistance surface (Files S2 and S3, 3m and 0.5m surfaces respectively). To validate the  
264 generated surfaces, we used field-obtained tracking data (obtained December 2018) withheld from the  
265 road network construction. Sixty-three segments along the withheld tracks were used to create  
266 validation points. Using the resistance surface, the cumulative travel time from the start to the end  
267 point of each segment was generated utilising a least-cost path algorithm within QGIS 3.4.4 (32). A linear  
268 regression model was then fitted to the observed travel time data with predicted travel time being  
269 included as the only covariate to quantify the relationship between the two measures. The ability of the  
270 predicted travel time to each validation point to accurately predict the observed travel time was used to  
271 detect an association between the two, and to provide a means of adjusting the generated surface  
272 values if necessary. The accuracy of each resistance surface was defined by the coefficient p-values, and  
273 by root-mean-square error (RMSE). Utilising these resistance surfaces, two separate cost-distance

274 analyses were performed (one per spatial resolution), each using the location of our district  
275 entomologist's base as the origin.

276

277 **2.13 Identifying optimal sentinel site placement:** We performed a spatially stratified sampling approach  
278 to aid the identification of 102 least-cost, high abundance locations per 25km<sup>2</sup> for sentinel site  
279 placement. Firstly, we produced a fishnet consisting of 5 km × 5 km grid squares across Koboko district,  
280 and assigned each grid square a sequential stratum identification number (see Fig. S2 for strata  
281 distribution). For each strata within the proposed intervention area, we ranked each cell by their  
282 predicted tsetse abundance values (11), and by their predicted travel time from the origin – as obtained  
283 from the cost-distance output. To account for spatial clustering, and to ensure a more even spatial  
284 distribution of sentinel sites, we retained the cell with the highest predicted abundance and lowest  
285 associated cost per 50m × 50m area. We calculated the cumulative rank for each cell within the de-  
286 clustered dataset, where predicted abundance values were ranked from high to low, and accessibility  
287 values ranked from low to high. We retained two locations (paired sites) with the lowest cumulative  
288 rank per sampled strata, with these locations being identified as the optimal placement for sentinel  
289 monitoring sites.

290

### 291 **3. Results**

292 **3.1 GPS data collection:** To inform estimates of on-road travel cost for each 3m × 3m and 0.5m × 0.5m  
293 cell within Koboko district, Northern Uganda, we obtained tracking data during three periods: May-June  
294 2017, February-April 2018, and December 2018-January 2019. Tracks collected between May 2017 -  
295 April 2018 were used to inform road speeds, and tracks collected between December 2018-January  
296 2019 were withheld for validating the resistance surfaces (Fig. S3).

297

298 **3.2 OpenStreetMap accuracy assessment:** Analyses evaluating the accuracy of an existing, community-  
299 driven, open-source road network (from OpenStreetMap), indicate that at least one road exists within  
300 the OpenStreetMap (OSM) dataset for 17 out of 25 randomly sampled 1km<sup>2</sup> grid squares across Koboko  
301 district (mean road length = 1.97 km). Only one out of 25 grid squares contained no visible roads across  
302 sources (i.e. 0.5m imagery, 3m imagery, and OSM). When comparing total road length visible in 3 × 3m  
303 imagery with that charted by OSM, the two sources show close agreement (97.43% similarity [total road  
304 length across 25km<sup>2</sup>], paired t-Test  $p = 0.91$ ), however, when comparing the 0.5 × 0.5m imagery and the  
305 OSM dataset, only 28.16% of digitised roads are charted by OSM (paired t-Test  $p < 0.001$ , Fig. 1, Table  
306 S1, Fig. S4). This section of the analysis provided the rationale for the classification of 0.5m imagery, with  
307 the inclusion potentially capturing up to 71% more roads than OSM within the study area.

308  
309 **Fig. 1.** Example of composite images of digitised road networks within Koboko district. Purple roads  
310 represent roads visible in 0.5m imagery (17), as digitised in this study; black roads represent roads  
311 visible in 3m imagery (24), as digitised in this study, and light blue roads represent roads available within  
312 the OSM dataset (18). The overlap of all three colours indicate areas of consistency across sources.

313  
314 **3.3 Image classification:** Classification of two differing sources of RS imagery (0.5 × 0.5m and 3 × 3m)  
315 yielded varying accuracies across classes, and across spatial resolutions, with accuracy values ranging  
316 from 38% to 89% for dirt roads and 5% to 84% for tarmac roads for 3m and 0.5m imagery respectively  
317 (Table 3; Fig. 2). Overall image classification accuracy, considering all five classes utilised (dirt road  
318 and/or track, tarmac road, dense vegetation, grassland and barren land), ranged from 53% (3m) to 78%  
319 (0.5m), with 0.5m imagery proving to be more effective at identifying both dirt and tarmac roads than  
320 the 3m imagery.

321

322 **Fig. 2. Confusion matrices for the classification of each surface (Left: 3m, Right: 0.5m).** Diagonal  
 323 squares (bottom left to top right) indicate the percentage of correctly classified cells per class.

324

325 **Table 3.** Maximum likelihood classification (MLC) accuracy assessment validation values for each class.  
 326 Values represent the percentage of correctly classified cells (classified vs ground truth) for the five  
 327 classes of interest.

| Class                  | 3m imagery |            |              | 0.5m imagery |            |              |
|------------------------|------------|------------|--------------|--------------|------------|--------------|
|                        | Correct    | Incorrect  | Accuracy (%) | Correct      | Incorrect  | Accuracy (%) |
| Dirt road and/or track | 38         | 62         | 38.00        | 97           | 11         | 89.81        |
| Tarmac road            | 5          | 95         | 5.00         | 84           | 16         | 84.00        |
| Dense vegetation       | 91         | 9          | 91.00        | 95           | 5          | 95.00        |
| Grassland              | 65         | 34         | 65.65        | 80           | 20         | 80.00        |
| Barren land            | 70         | 30         | 70.00        | 38           | 54         | 41.30        |
| <b>Overall</b>         | <b>269</b> | <b>230</b> | <b>53.91</b> | <b>394</b>   | <b>106</b> | <b>78.80</b> |

328

329 **3.4 Resistance surface and cost-distance analysis:** The accuracy of the resistance surfaces was assessed  
 330 by investigating the relationship between observed travel times and predicted travel times using  
 331 withheld field-obtained tracks and a linear regression. Predicted values produced utilising the 3m  
 332 resistance surface have a much closer alignment with ground truth (observed) values, root-mean-square  
 333 error (RMSE) = 3.93 (3m) than the 0.5m resistance surface (RMSE = 6.01). In separate regressions with  
 334 validation data from both surfaces, we identify that there is a significant association between observed  
 335 and predicted values ( $p < 0.001$  (0.5m) and  $p < 0.001$  (3m)), indicating a high performance of each  
 336 surface, with the 3m surface showing a stronger relationship with less variability ( $R^2 = 0.66$  vs  
 337  $R^2 = 0.49$ , 3m and 0.5m respectively). Summaries of resistance surface validation are provided within

338 Fig. S5 and Table 4. Output cost-distance surfaces detailing the travel time from the location of our field  
339 station to each gridded cell within Koboko district are provided as Fig.3.

340

341 **Table 4.** Model summaries for resistance surface validation. Summary statistics from four separate  
342 linear regressions are provided.

343

|                | 3m resistance surface |                 | 0.5m resistance surface |                 |
|----------------|-----------------------|-----------------|-------------------------|-----------------|
|                | Training data         | Validation data | Training data           | Validation data |
| p-value        | < 0.001               | < 0.001         | < 0.001                 | < 0.001         |
| Coefficient    | 1.10                  | 0.59            | 0.78                    | 0.34            |
| RMSE           | 1.11                  | 3.93            | 0.85                    | 6.01            |
| R <sup>2</sup> | 0.93                  | 0.66            | 0.95                    | 0.49            |

344

345 **Fig. 3.** Cost-distance surfaces. Figures show the cumulative travel time from the field site origin (black  
346 point), to each subsequent cell within the surface. Left: 3m cost-distance surface, Right: 0.5m cost-  
347 distance surface. This figure was generated using ArcGIS version 10.4 (33), and products derived in this  
348 study from image classification of Planet (3m)(24) and Airbus (0.5m)(17) satellite imagery.

349

350 **3.5 Identification of optimal sentinel site placement:** Utilising the 3m cost-distance surface and a  
351 predictive surface of tsetse abundance (11), we identified the optimal placement of 104 sentinel sites  
352 within the current intervention area (52 paired locations) (Fig. 4). Such sites are positioned within the  
353 most easily accessible, high abundant locations for 26 unique 5 x 5 km strata across the intervention  
354 area. Optimal sentinel-site placement identifies locations with abundance values ranging from 0.04-



355 19.57 (mean = 5.21) flies per cell, and locations which are within 5.55 - 151.81 (mean = 68.42) minutes  
356 from the field station location.

357

358 **Fig. 4.** Optimal placement of sentinel sites (max two sites per grid square [25km<sup>2</sup>]) within Koboko  
359 district. Location of optimal sites visualised alongside the 3m accessibility surface (this study) and tsetse  
360 abundance surface (11), dashed lines represent the 5 x 5km sampling strata used to allocate optimal  
361 sites. This figure was generated using ArcGIS version 10.4 (33).

362

#### 363 **4. Discussion**

364 This analysis investigated the ability of high-resolution satellite imagery to inform estimates of  
365 accessibility to entomological sampling sites, using tsetse control as an example application. We started  
366 by scrutinising the completeness of an existing open source road network for Koboko district, Uganda,  
367 comparing charted roads with those obtainable from manual digitisation of RS imagery at two differing  
368 spatial resolutions. Results from this section of the analysis indicate that, for this region of Uganda,  
369 roads visible within 3m imagery matched 97.43% of roads identified in OSM (paired t-Test  $p = 0.91$ ) (Fig.  
370 1, Table S1). Comparing roads visible within 0.5m RS imagery, and those charted by OSM, yields 28.16%  
371 consistency across sources (paired t-Test  $p < 0.001$ ) (Table S1).

372

373 As data published on OSM is the result of community contributions incorporating local knowledge, data  
374 coverage is often inconsistent. The recent establishment of several refugee camps across the West Nile  
375 Region has resulted in increased road mapping efforts within this area, which explains the high levels of  
376 coverage seen here (34). OpenStreetMap completeness varies globally and the analyses we have  
377 developed will be particularly useful in places where OSM and standard sources of information on road  
378 networks are scant (35).

379

380 Part of our analysis aimed to infer the effect of including spatially disaggregated data on estimates of  
381 accessibility, detailing whether the extra information obtainable from 0.5m imagery produces refined  
382 estimates. The results of a maximum likelihood classification algorithm indicate a high ability to identify  
383 roads and associated features within the 0.5m imagery, mirroring that seen by manual digitisation  
384 (Table 3; Fig. 2). Results from image classification also indicate that the spatial detail available within 3m  
385 imagery is too coarse to classify roads in this district accurately (38% and 5% accuracy for dirt and  
386 tarmac roads respectively). This result is to be expected as the majority of roads within Koboko district  
387 rarely exceed a width of 3m, resulting in decreased visibility; narrow roads are likely to be common  
388 across large parts of rural Africa. The utility of 3m imagery may be greater in more developed areas,  
389 where roads exceed 3m in width.

390

391 Despite a higher image classification accuracy and a better model fit to training data, the 0.5m  
392 resistance surface appears to under-perform when presented with out-of-sample, withheld tracking  
393 data compared to the 3m resistance surface (Table 4, Fig. S5). Both resistance surfaces show a  
394 significant linear relationship between observed and predicted values, however, the 3m resistance  
395 surface has a lower root-mean-square error (3.93 vs 6.01 respectively). This under-performance may be  
396 due to the increased number of roads within the 0.5m resistance surface, and some of the assumptions  
397 made regarding travel along roads of differing class. When using the surfaces to identify optimal  
398 placement of sentinel-sites, the relative travel-time to each cell is more informative than the actual  
399 travel-time. Despite varying RMSEs, the significant relationship between predicted and observed travel  
400 times, support the utility of the generated surfaces.

401

402 By combining the generated 3m accessibility surface (Fig. 3) with previously published estimates of  
403 tsetse-abundance (11), we provide a novel framework for the identification of cost-effective locations in  
404 which to place sentinel-monitoring sites (Fig. 4). Previous methods to inform the placement of sentinel-  
405 monitoring sites have been based on intuition, incorporating knowledge of tsetse ecology and local  
406 knowledge of roads within an intervention area. Here, we further quantify this process, providing a  
407 more robust approach that can be applied to a range of vector-borne diseases. The movement from a  
408 nuanced, ad-hoc process to an evidence-based one will allow for a more efficient assessment of tsetse  
409 control programmes. The application of the methods used here to the context of intervention  
410 monitoring and assessment is novel, and the refinement of results has several cost-effective implications  
411 as vector control expands to other areas within the region.

412  
413 Several important vector-borne NTDs have been targeted for elimination as a public-health problem by  
414 2020 within the WHO NTD roadmap (4). Unfortunately, however, the burden of numerous VBDs will  
415 continue beyond the ambitious 2020 target (36-38). As evident within the WHO roadmap, both disease  
416 and vector surveillance form large components of most elimination strategies; however, the Strategic  
417 and Technical Advisory Group (STAG) for NTDs also recognise the need for a better understanding of the  
418 economic aspects of NTD control. By providing methods to ensure that vector control programmes  
419 operate at maximum cost-effectiveness, we can ensure that the limited funding associated with some of  
420 these NTDs has the largest impact.

421  
422 Although this analysis does not serve as an economic evaluation of methods to assess control  
423 programme efficacy, previous work has shown that vehicle running and travel costs are within the top  
424 five associated costs of running a tsetse control programme (39, 40), with staff salaries being the most  
425 expensive element. By strategically placing sentinel-monitoring sites in locations that are associated

426 with a low accessibility cost, programmes can reduce costs associated with travel (e.g., fuel,  
427 maintenance) and staff expenses, with current costs of tsetse monitoring being ~9.0\$/km<sup>2</sup>/year (10.6%  
428 of tsetse control programme budgets) (40). The accessibility surface may also contribute toward cost-  
429 effective planning of pre-intervention surveys, which are responsible for roughly 6% of control program  
430 budgets (40). Furthermore, by informing the positioning of these sites by additional metrics, such as pre-  
431 intervention abundance, we identify locations that may provide more accurate evaluations of control  
432 efficacy. Accessibility, in general, is a very sought-after metric and the methodology applied here,  
433 although currently restricted to one district in Northern Uganda and limited to the purpose of  
434 identifying accessible tsetse monitoring sites, could inform other accessibility analyses within the area  
435 such as access to HAT diagnostic centres, and be applied to a range of vector-borne diseases.

436

#### 437 **Acknowledgements:**

438 JL is funded by a Medical Research Council Scholarship (Award no. 1964851). SJT is funded by grants  
439 from the Bill & Melinda Gates Foundation (OPP1104516), the Biotechnology and Biological Sciences  
440 Research Council, the Department for International Development, The Economic and Social Science  
441 Research Council, The Natural Environment Research Council and the Defence, Science and Technology  
442 Laboratory, under the Zoonosis and Emerging and Livestock Systems (ZELS) programme (Grant no.  
443 BB/L019035/1). The Bill & Melinda Gates Foundation grant OPP1104516 also supports MCS. MCS  
444 acknowledges additional funding from the Medical Research Council (MR/M014975/1). The funders had  
445 no role in study design, data collection and analysis, decision to publish or preparation of the  
446 manuscript. The authors declare no conflicts of interest.

447

448 **Author contributions:**

449 SJT, MCS and JL conceived and planned the study. JL and AK were involved in field study design and data  
450 collection. JL wrote all computer code and designed and performed the analysis. JL wrote the first draft  
451 of the manuscript, and all authors contributed toward subsequent revisions. All authors gave final  
452 approval for publication.

453

454 **Data Availability:**

455 Resistance surfaces will be hosted within Dryad upon acceptance. Code used to generate and validate  
456 surfaces can be found within: [https://github.com/joshlongbottom/Uganda\\_accessibility](https://github.com/joshlongbottom/Uganda_accessibility) (repository to  
457 be made public upon acceptance).

458

459 **References:**

- 460 1. World Health Organization. Vector-borne diseases 2017 [Available from:  
461 <https://www.who.int/en/news-room/fact-sheets/detail/vector-borne-diseases>.  
462 2. Sedda L, Lucas ER, Djogbenou LS, Edi AVC, Egyr-Yawson A, Kabula BI, et al. Improved spatial  
463 ecological sampling using open data and standardization: an example from malaria mosquito  
464 surveillance. bioRxiv. 2018:465963.  
465 3. Franco JR, Cecchi G, Priotto G, Paone M, Diarra A, Grout L, et al. Monitoring the elimination of  
466 human African trypanosomiasis: Update to 2014. PLoS Negl Trop Dis. 2017;11(5):e0005585.  
467 4. World Health Organization. Accelerating work to overcome neglected tropical diseases: a  
468 roadmap for implementation. Geneva; 2012.  
469 5. Moloo A. Eliminating sleeping sickness as a public health problem is on track 2017 [Available  
470 from: [http://www.who.int/trypanosomiasis\\_african/news/HAT\\_elimination\\_on\\_track/en/](http://www.who.int/trypanosomiasis_african/news/HAT_elimination_on_track/en/).  
471 6. Picozzi K, Fèvre E, Odiit M, Carrington M, Eisler MC, Maudlin I, et al. Sleeping sickness in Uganda:  
472 a thin line between two fatal diseases. BMJ. 2005;331(7527):1238-41.  
473 7. Berrang-Ford L, Odiit M, Maiso F, Waltner-Toews D, McDermott J. Sleeping sickness in Uganda:  
474 revisiting current and historical distributions. Afr Health Sci. 2006;6(4):223-31.  
475 8. Welburn SC, Coleman PG, Maudlin I, Fèvre EM, Odiit M, Eisler MC. Crisis, what crisis? Control of  
476 Rhodesian sleeping sickness. Trends in parasitology. 2006;22(3):123-8.  
477 9. Tirados I, Esterhuizen J, Kovacic V, Mangwiro TNC, Vale GA, Hastings I, et al. Tsetse control and  
478 Gambian sleeping sickness; implications for control strategy. PLoS Negl Trop Dis. 2015;9(8):e0003822.  
479 10. Lehane M, Alfaroukh I, Bucheton B, Camara M, Harris A, Kaba D, et al. Tsetse control and the  
480 elimination of Gambian sleeping sickness. PLoS Negl Trop Dis. 2016;10(4):e0004437.

- 481 11. Stanton MC, Esterhuizen J, Tirados I, Betts H, Torr SJ. The development of high resolution maps  
482 of tsetse abundance to guide interventions against human African trypanosomiasis in northern Uganda.  
483 *Parasites & vectors*. 2018;11(1):340.
- 484 12. Juran S, Broer PN, Klug SJ, Snow RC, Okiro EA, Ouma PO, et al. Geospatial mapping of access to  
485 timely essential surgery in sub-Saharan Africa. *BMJ Glob Health*. 2018;3(4):e000875.
- 486 13. Agbenyo F, Marshall Nunbogu A, Dongzagla A. Accessibility mapping of health facilities in rural  
487 Ghana. *J Transp Health*. 2017;6:73-83.
- 488 14. Ouma PO, Maina J, Thuranira PN, Macharia PM, Alegana VA, English M, et al. Access to  
489 emergency hospital care provided by the public sector in sub-Saharan Africa in 2015: a geocoded  
490 inventory and spatial analysis. *Lancet Glob Health*. 2018;6(3):e342-e50.
- 491 15. Delamater PL, Messina JP, Shortridge AM, Grady SC. Measuring geographic access to health  
492 care: raster and network-based methods. *International journal of health geographics*. 2012;11(1):15-.
- 493 16. Planet. Planet imagery product specification: PlanetScope & RapidEye. 2016.
- 494 17. Airbus. Satellite Data 2019 [Available from: [https://www.intelligence-airbusds.com/en/8289-  
495 imagery-services](https://www.intelligence-airbusds.com/en/8289-imagery-services)].
- 496 18. OpenStreetMap contributors. Geofabrik OpenStreetMap Data Extracts. 2018.
- 497 19. ESRI. ArcMap 10.3: Spatial Analyst Toolbox: How Maximum Likelihood Classification works 2016  
498 [Available from: [http://desktop.arcgis.com/en/arcmap/10.3/tools/spatial-analyst-toolbox/how-  
499 maximum-likelihood-classification-works.htm](http://desktop.arcgis.com/en/arcmap/10.3/tools/spatial-analyst-toolbox/how-maximum-likelihood-classification-works.htm)].
- 500 20. Houben RM, Van Boeckel TP, Mwinuka V, Mzumara P, Branson K, Linard C, et al. Monitoring the  
501 impact of decentralised chronic care services on patient travel time in rural Africa - methods and results  
502 in Northern Malawi. *International journal of health geographics*. 2012;11:49.
- 503 21. Soule RG, Goldman RF. Terrain coefficients for energy cost prediction. *J Appl Physiol*.  
504 1972;32(5):706-8.
- 505 22. Uganda Bureau of Statistics. Projections of demographic trends in Uganda 2007-2017. Kampala,  
506 Uganda: Uganda Bureau of Statistics,; 2016.
- 507 23. World Health Organization. Global Health Observatory data repository: Human African  
508 Trypanosomiasis: World Health Organization; 2019 [Available from:  
509 <http://apps.who.int/gho/data/node.main.A1635?lang=en>].
- 510 24. Planet. Planet Explorer 2018 [Available from:  
511 [https://www.planet.com/explorer/#/mosaic/global\\_monthly\\_2018\\_04\\_mosaic](https://www.planet.com/explorer/#/mosaic/global_monthly_2018_04_mosaic)].
- 512 25. ASTRIUM. Pléiades Imagery - User Guide. 2012.
- 513 26. Bohannon RW. Comfortable and maximum walking speed of adults aged 20—79 years:  
514 reference values and determinants. *Age Ageing*. 1997;26(1):15-9.
- 515 27. Facebook Connectivity Lab, Center for International Earth Science Information Network - CIESIN  
516 - Columbia University. High Resolution Settlement Layer. 2016.
- 517 28. Traffic and Road Safety Act (Uganda). The Traffic and Road Safety (Speed Limits) Regulations,  
518 2004.; 2004. Contract No.: Section 131(k) of the Traffic and Road Safety Act, Cap. 361.
- 519 29. Ministry of Works and Transport. The Highway Code. Uganda; 2009.
- 520 30. Sellers PJ. Canopy reflectance, photosynthesis and transpiration. *Int J Remote Sens*.  
521 1985;6(8):1335-72.
- 522 31. Ranga B. Myneni, Forrest G. Hall, Piers J. Sellers, Marshak A. The interpretation of spectral  
523 vegetation indexes. *IEEE Trans Geosci Remote Sens*. 1995;33(2):481-6.
- 524 32. QGIS Development Team. QGIS Geographic Information System version 3.4.4. Open Source  
525 Geospatial Foundation Project. <http://qgisosgeoorg>. 2019.
- 526 33. ESRI. ArcGIS Desktop: Release 10.4.1. Redlands, CA: Environmental Systems Research Institute.;  
527 2011.

- 528 34. Geoffrey Kateregga. Community mapping for refugees in Uganda 2018 [updated 19<sup>th</sup> March  
529 2019. Available from: [https://2018.stateofthemap.org/slides/T037-  
530 Community\\_Mapping\\_for\\_Refugees\\_in\\_Uganda.pdf](https://2018.stateofthemap.org/slides/T037-Community_Mapping_for_Refugees_in_Uganda.pdf).
- 531 35. Barrington-Leigh C, Millard-Ball A. The world's user-generated road map is more than 80%  
532 complete. PLoS One. 2017;12(8):e0180698.
- 533 36. Ferguson NM. Challenges and opportunities in controlling mosquito-borne infections. Nature.  
534 2018;559(7715):490-7.
- 535 37. Hotez PJ, Basáñez M-G, Acosta-Serrano A, Grillet ME. Venezuela and its rising vector-borne  
536 neglected diseases. PLoS Negl Trop Dis. 2017;11(6):e0005423.
- 537 38. Mackey TK, Liang BA, Cuomo R, Hafen R, Brouwer KC, Lee DE. Emerging and reemerging  
538 neglected tropical diseases: a review of key characteristics, risk factors, and the policy and innovation  
539 environment. Clin Microbiol Rev. 2014;27(4):949-79.
- 540 39. Muhanguzi D, Okello WO, Kabasa JD, Waiswa C, Welburn SC, Shaw AP. Cost analysis of options  
541 for management of African animal trypanosomiasis using interventions targeted at cattle in Tororo  
542 district; south-eastern Uganda. Parasit Vectors. 2015;8:387.
- 543 40. Shaw APM, Tirados I, Mangwiro CTN, Esterhuizen J, Lehane MJ, Torr SJ, et al. Costs of using "Tiny  
544 Targets" to control *Glossina fuscipes fuscipes*, a vector of Gambiense sleeping sickness in Arua district of  
545 Uganda. PLoS Negl Trop Dis. 2015;9(3):e0003624.

546

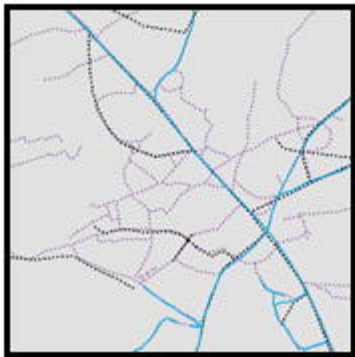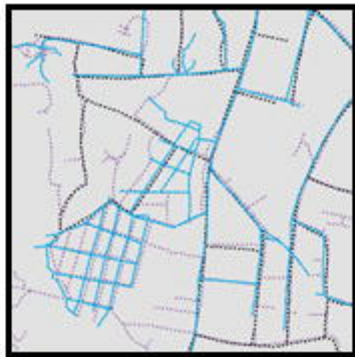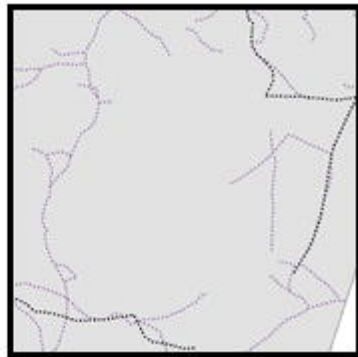



3m validation

0.5m validation

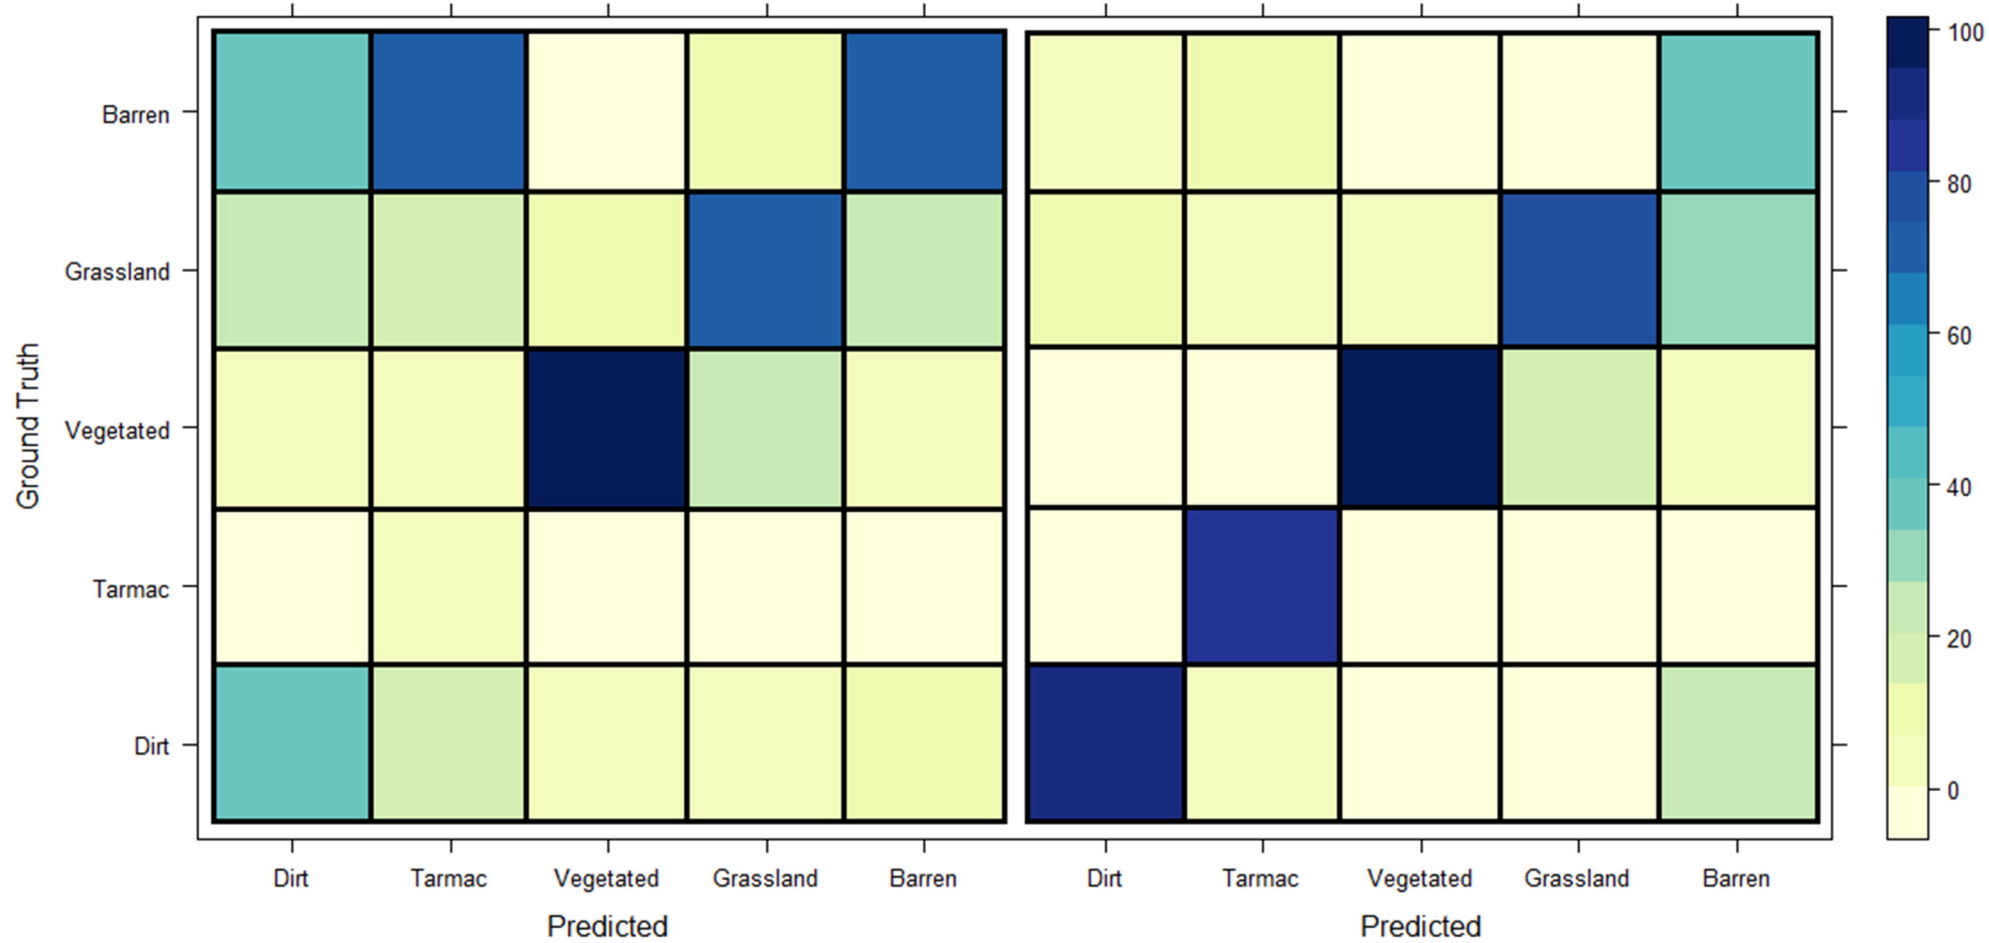

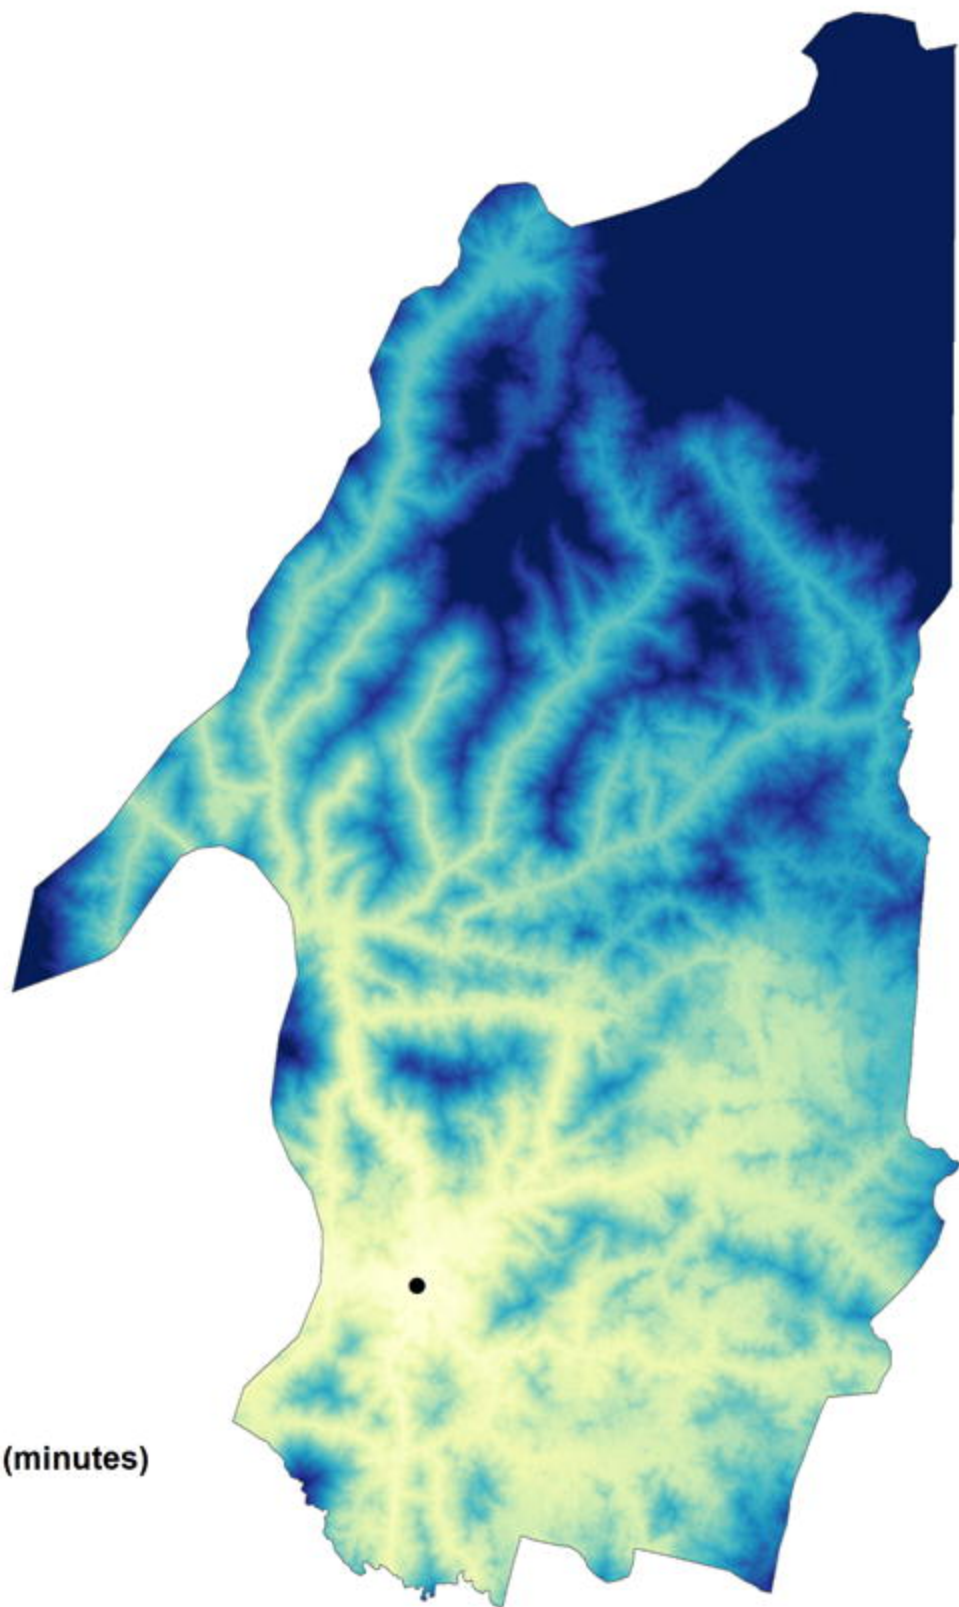

Travel time (minutes)

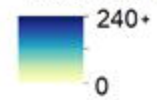

● Koboko origin

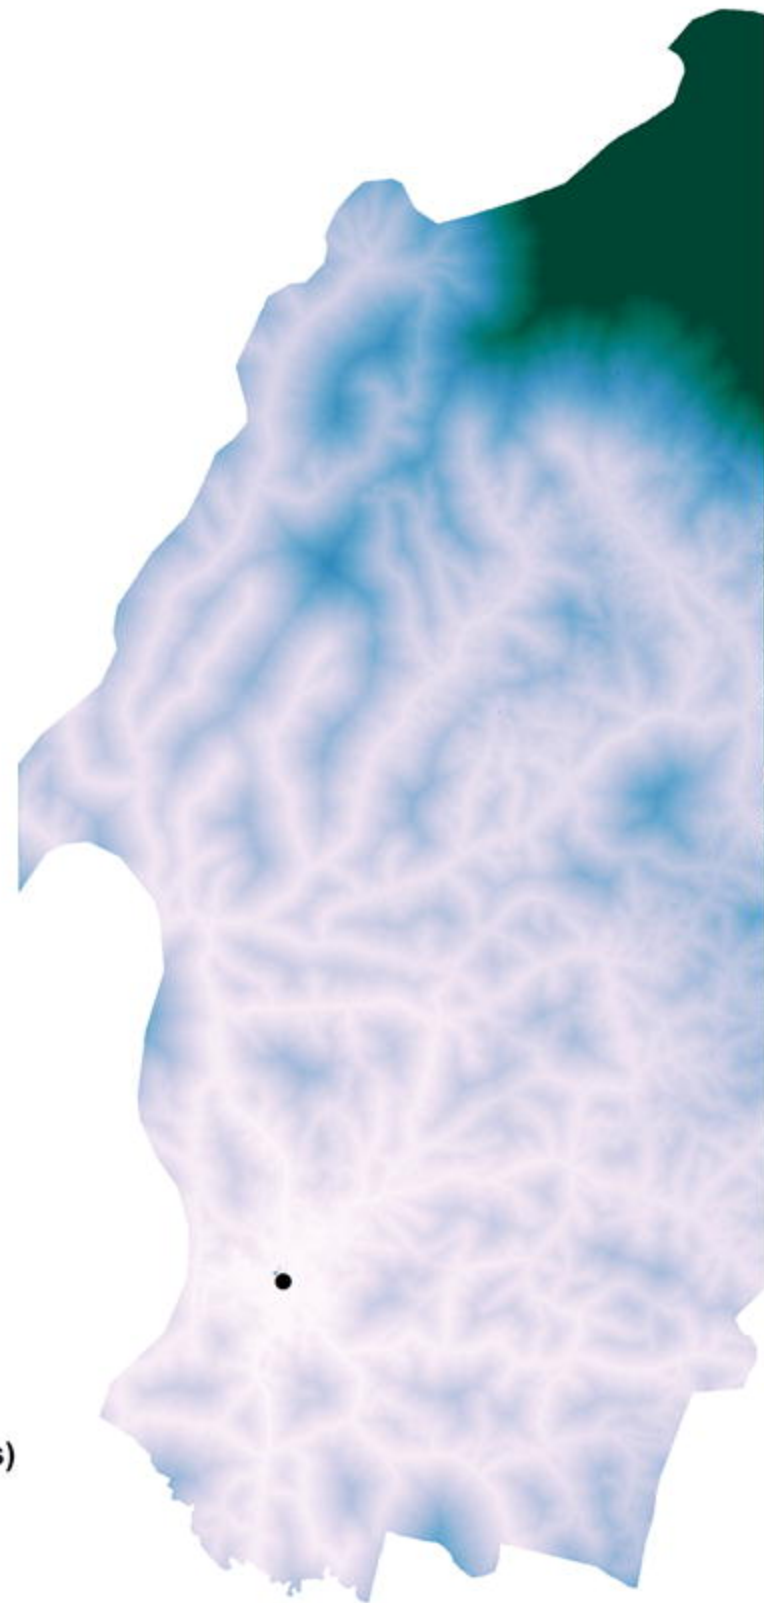

Travel time (minutes)

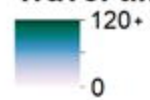

● Koboko origin

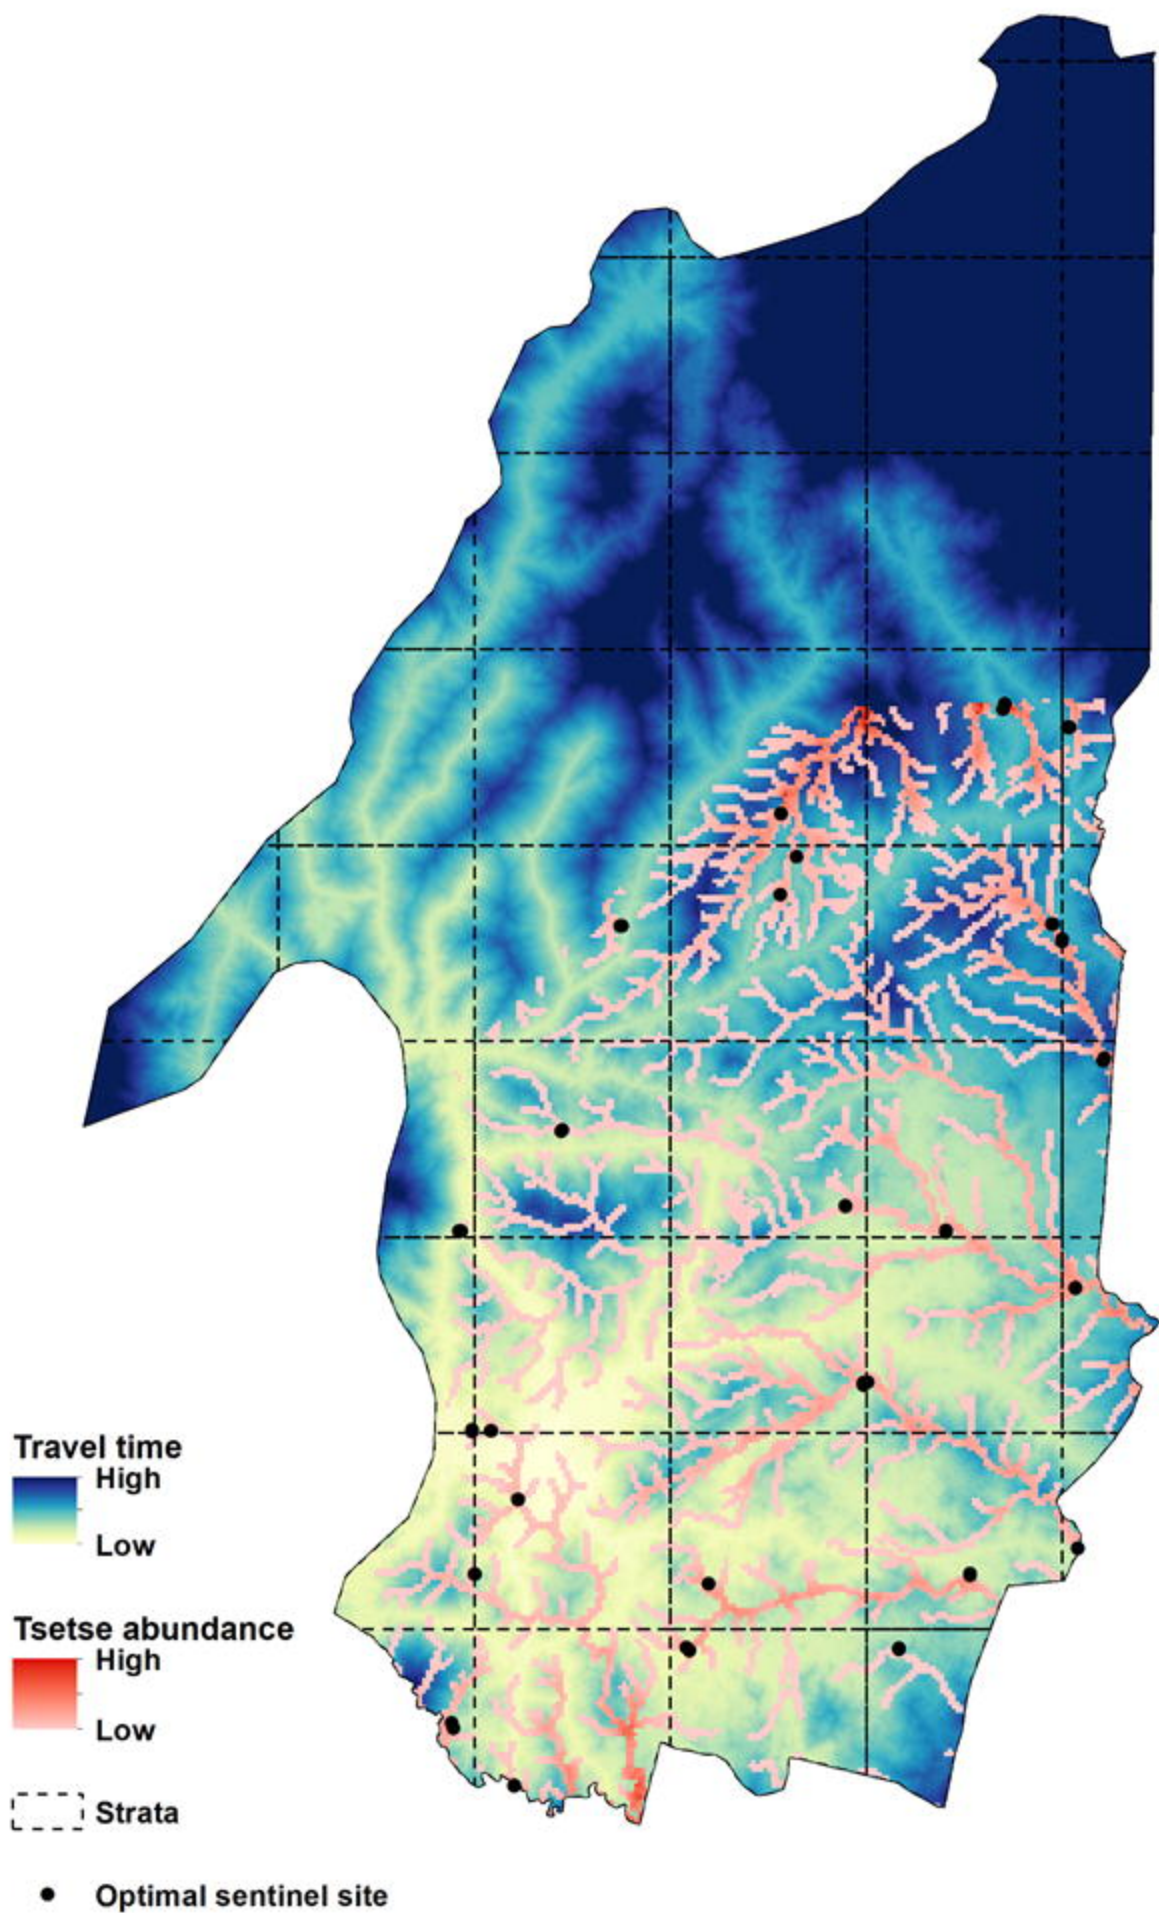

Source: https://biorxiv.org/content/biorxiv/early/2019/09/23/779561.full-text.pdf
